# Supplementary material for: Fe(iii)-based coordination polymernanoparticles: peroxidase-like catalytic activity and their application to hydrogen peroxide and glucose detection
Source: Royal Society of Chemistry journal article supplement (doi:10.1039/c1cy00360g), 2011-10-17
Supplement: c1cy00360g.pdf [file c1cy00360g.pdf]

## **Electronic Supplementary Information**

# Fe(III)-based coordination polymer nanoparticles: peroxidase-like catalytic activity and their application to hydrogen peroxide and glucose detection

Jingqi Tian,<sup>1,2</sup> Sen Liu,<sup>1</sup> Yonglan Luo<sup>1</sup> and Xuping Sun<sup>1\*</sup>

<sup>1</sup>State Key Lab of Electroanalytical Chemistry, Changchun Institute of Applied Chemistry, Changchun 130022, Jilin, P. R. China

<sup>2</sup>Chinese Academy of Sciences, Graduate School of the Chinese Academy of Sciences, Beijing 100039, P. R. China

\*To whom correspondence should be addressed. Tel/Fax: +86-431-85262065. E-mail: sunxp@ciac.jl.cn

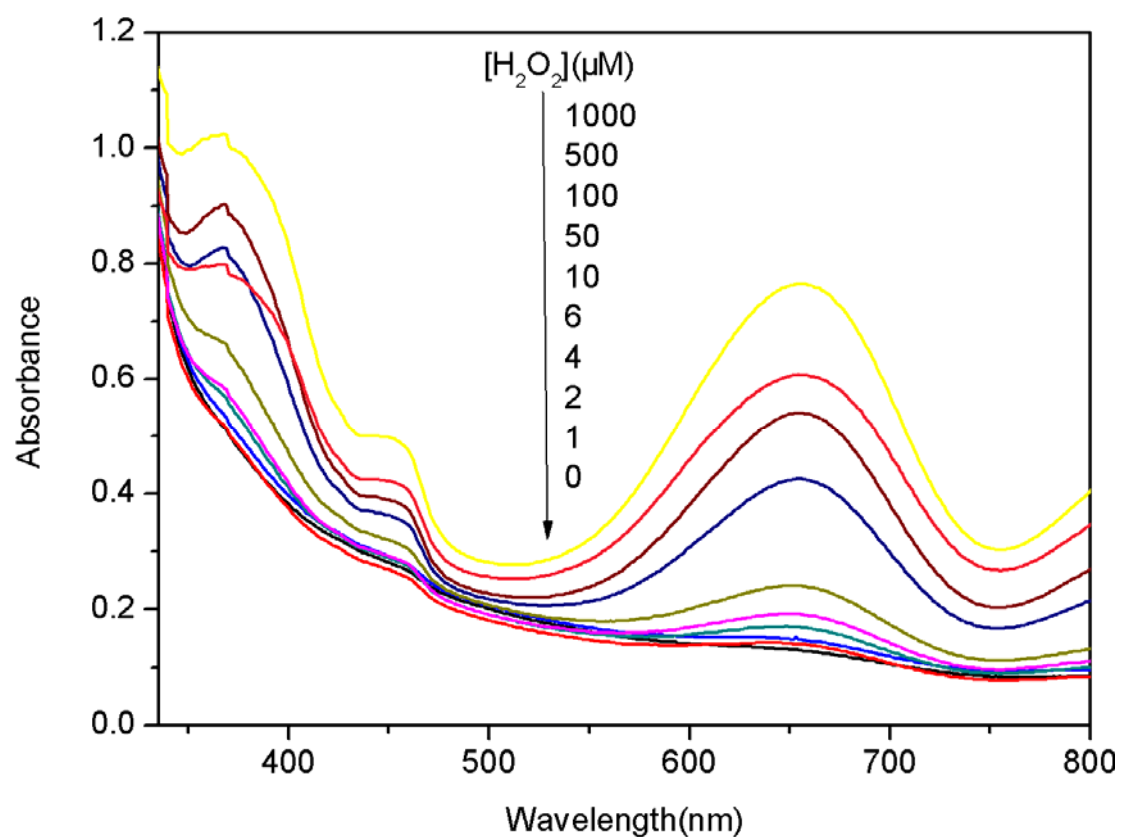

**Fig. S1** UV/Vis spectra for a solution of TMB-H<sub>2</sub>O<sub>2</sub>-FeCPNPs in 0.2 M NaAc buffer (pH 4.0) at 45 °C. The TMB concentration was 200 μM and 50 μL of FeCPNPs dispersion was used.
